# Supplementary material
Source: Springer Nature journal article supplement (https://www.springermedizin.de/resource/supplementary/12943_2014_1446_MOESM3_ESM.pdf/9553020)

A

pfp/rag2

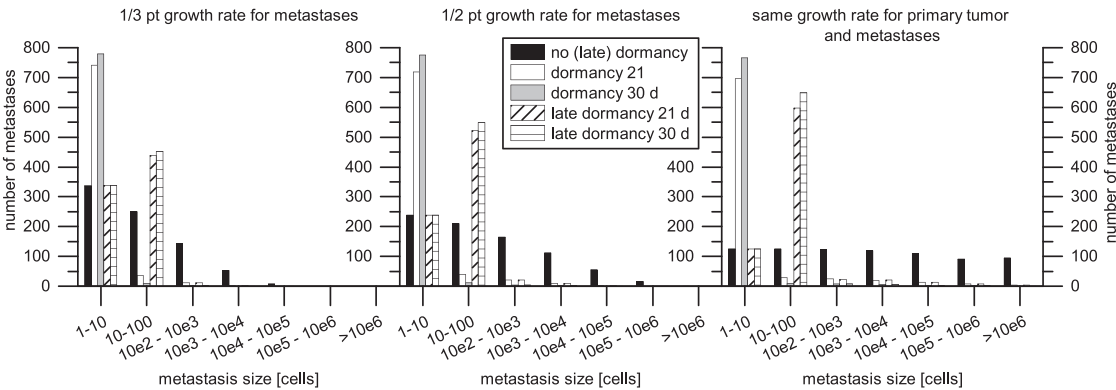

B

rag2

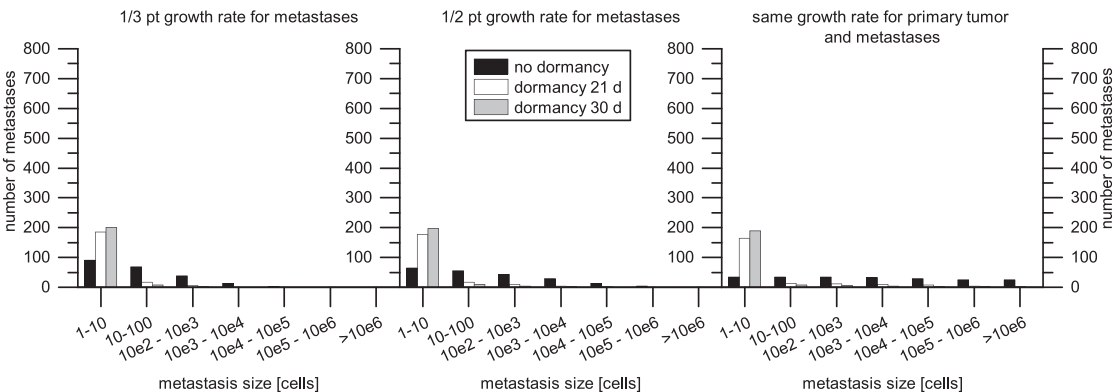

Supplement: MOESM3 [file 9553020]
